# Supplementary material for: Vortex-assisted dispersive liquid–liquid microextraction for the determination of molybdenum in plants by inductively coupled plasma optical emission spectrometry
Source: Royal Society of Chemistry journal article supplement (doi:10.1039/c5ay02561c), 2016-01-01
Supplement: c5ay02561c1.pdf [file c5ay02561c1.pdf]

Table S1. The code for the developed software in Arduino<sup>®</sup> language used for controlling the solenoid valve.

---

```
//Software for solenoid valve control

int valvePin = 3; //valve

void setup()
{pinMode (3, OUTPUT);
}

void loop ()
{digitalWrite (3, HIGH); //open valve
delay (110000);
digitalWrite (3, LOW); //close valve
delay (20000);

for (int i=0; i<=5; i++) //creates sampling cycle
{digitalWrite (3, HIGH); //open valve
delay (10000); //Sample nebulization
digitalWrite (3, LOW); //close valve
delay (20000); //Clean-up
}
}
```

---
